# Supplementary material for: The Impact of Protease during Recovery from Viable but Non-Culturable (VBNC) State in Vibrio cholerae
Source: MDPI journal article supplement (doi:10.3390/microorganisms9122618), 2021-12-18
Supplement: s1 [file s1]

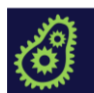

## Supplementary Material

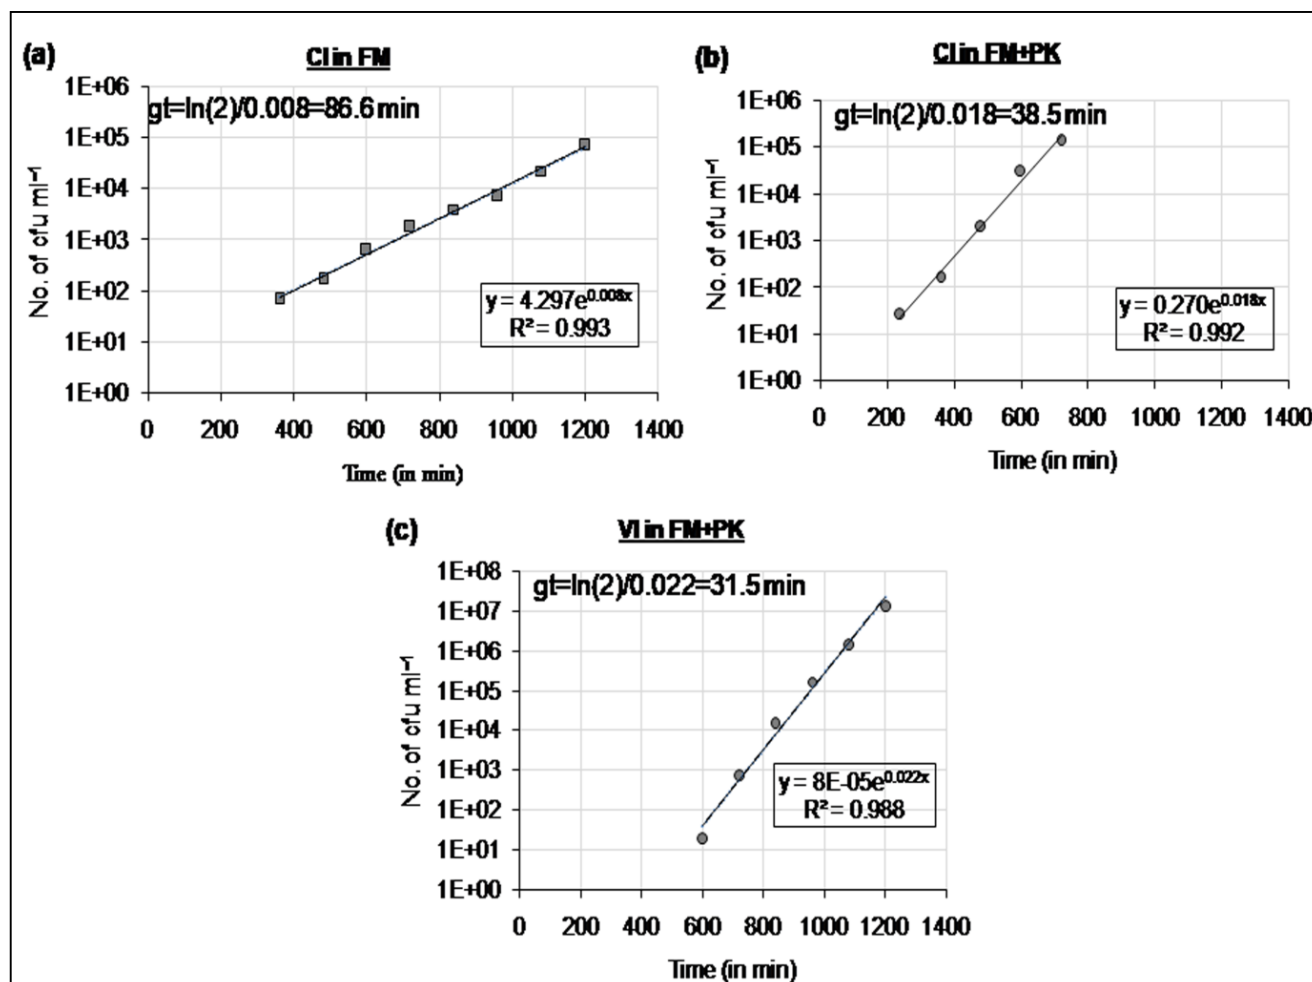

**Figure S1.** (a), (b) The calculation of generation time (gt) of culturable (CI) cells in ASW media (FM) and proteinase K supplemented ASW media (FM+PK). The data points which represents log phase from growth curve were used to determine the generation time for CI cells in FM and FM+PK media. All the experiments were performed thrice and each data point represents the mean  $\pm$  SE. (c) The calculation of generation time (gt) of VBNC (VI) cells in FM+PK. The data points which represents log phase from growth curve were used to determine the generation time for VI cells in FM+PK media. All the experiments were performed thrice, and each data point represents the mean  $\pm$  SE.

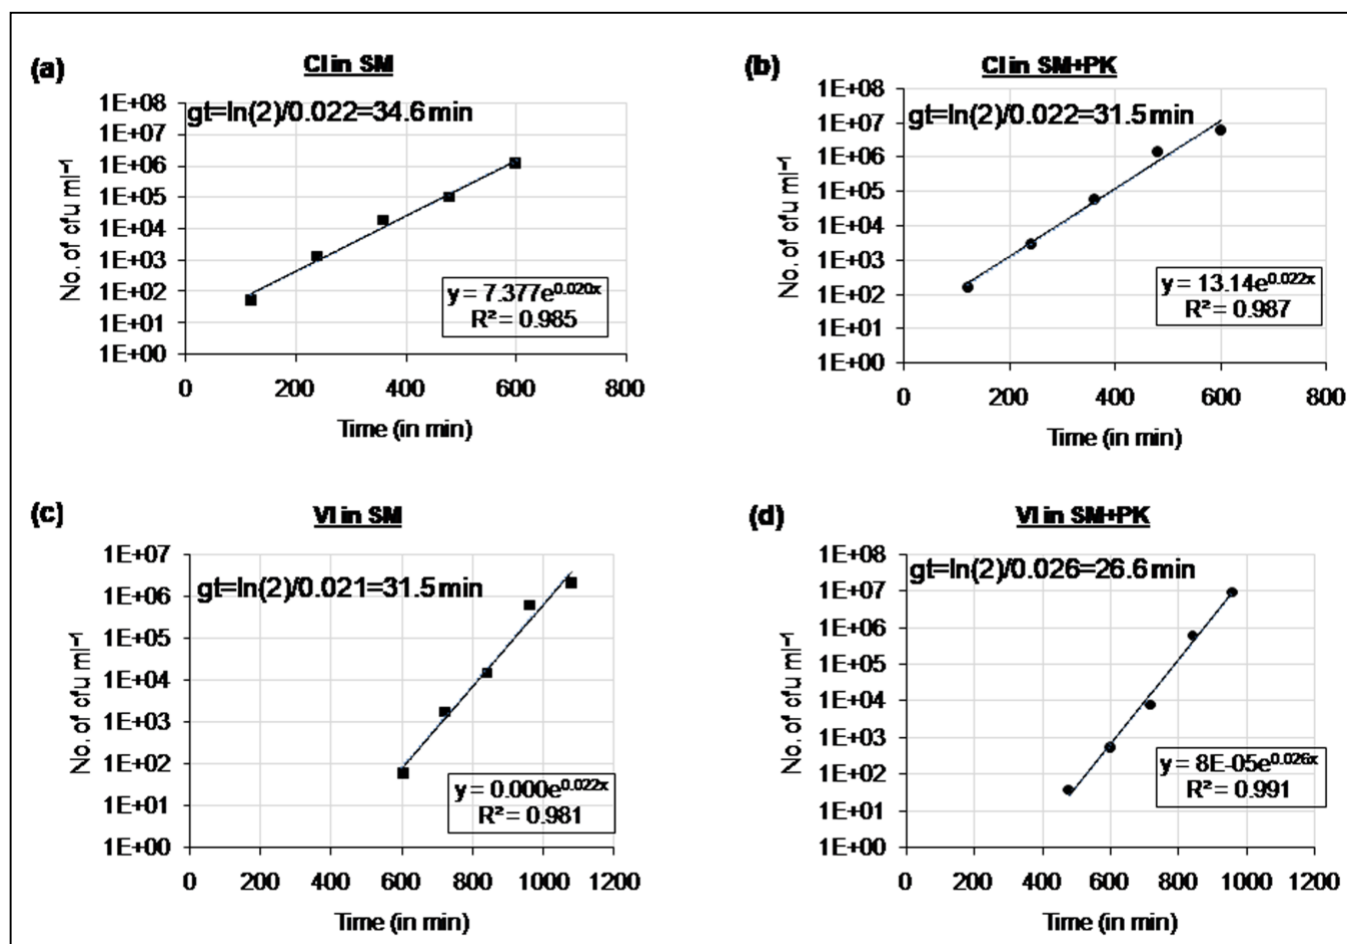

**Figure S2.** (a), (b) The calculation of generation time (gt) of culturable (CI) cells in spent ASW media (SM) and proteinase K supplemented spent ASW media (SM+PK). The data points which represents log phase from growth curve were used to determine the generation time for CI cells in SM and SM+PK media. All the experiments were performed thrice and each data point represents the mean  $\pm$  SE. (c), (d) The calculation of generation time (gt) of VBNC (VI) cells in SM and SM+PK. The data points which represents log phase from growth curve were used to determine the generation time for VI cells in SM and SM+PK media. All the experiments were performed thrice, and each data point represents the mean  $\pm$  SE.

**Table S1.** List of primers used in this study.

| Gene locus     | Primer     | Sequence (5'→3')         |
|----------------|------------|--------------------------|
| <i>vc0099</i>  | vc0099_Fo  | CCATAAACGGCTGCACATAAC    |
|                | vc0099_Rv  | CTATGCTTTGGCTGGGTATCT    |
| <i>vc1200</i>  | vc1200_Fo  | TCGAGTTAGCACAAACCAGTAG   |
|                | vc1200_Rv  | CCCATCCAGCCACTGTAAAA     |
| <i>vca0803</i> | vca0803_Fo | ACTGCCGAAGAATCGACATAG    |
|                | vca0803_Rv | GTGGTTCCTCAGTTGGAAGAT    |
| <i>vc1989</i>  | vc1989_Fo  | CTGCTCATCTTGGGTTAAATCATC |
|                | vc1989_Rv  | GCGCATGGAAGAAGTGTATTG    |
| <i>dnaK</i>    | dnaK_Fo    | TACTGCAAGGTGAGCGTAAG     |
|                | dnaK_Rv    | GTCTGCATCCAAGTCGAAGATA   |
| <i>groEL</i>   | groEL_Fo   | CGTTTCTCCTTCCACATCTT     |
|                | groEL_Rv   | CATCCTGCTGGTGGATAAGAA    |
